# Supplementary material
Source: PubMed Central journal article supplement (PMC1948953)

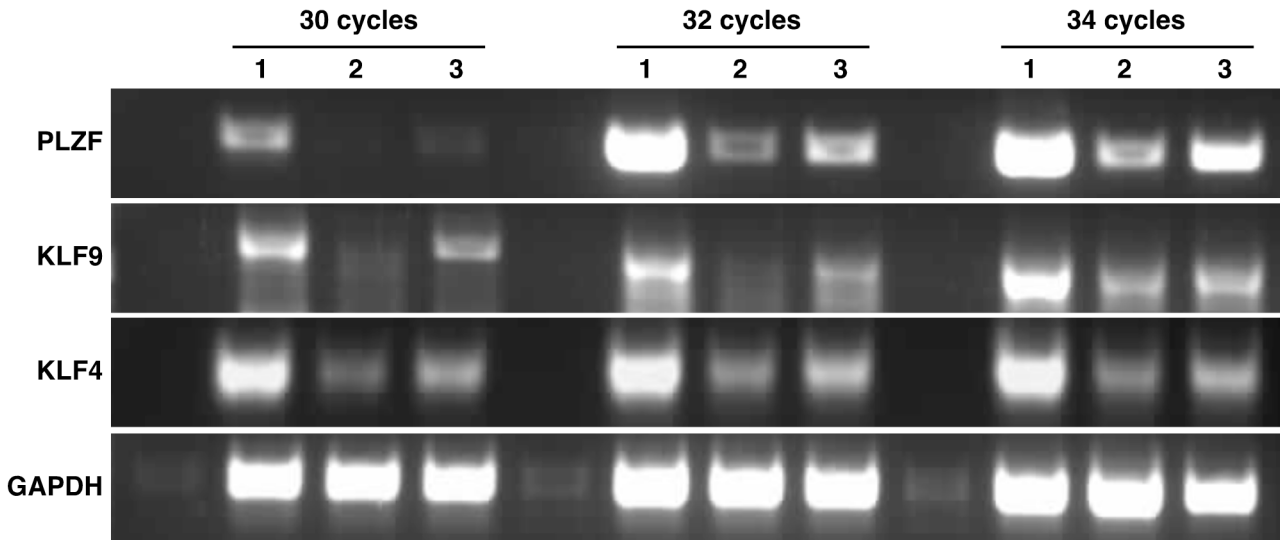

1. Naïve
2. IgM memory
3. Switched memory

Supplement: pnas_0703872104_1.pdf [file pnas_0703872104_1.pdf]
